# Supplementary material
Source: publisher figshare collection journal article supplement (https://acs.figshare.com/ndownloader/files/4287040)
Supplement: Supplementary file 1 [file 4287040]

 
data_amg2308_0m

_audit_creation_method           SHELXL-97
_chemical_name_systematic        ?
_chemical_name_common            ?
_chemical_formula_moiety         'C23 H27 N O3'
_chemical_formula_sum            'C23 H27 N O3'
_chemical_melting_point          ?

_exptl_crystal_description       needle_plate
_exptl_crystal_colour            colourless

_diffrn_ambient_temperature      173(2)
_chemical_formula_weight         365.46

loop_
_atom_type_symbol
_atom_type_description
_atom_type_scat_dispersion_real
_atom_type_scat_dispersion_imag
_atom_type_scat_source
C C 0.0181 0.0091 'International Tables Vol C Tables 4.2.6.8 and 6.1.1.4'
H H 0.0000 0.0000 'International Tables Vol C Tables 4.2.6.8 and 6.1.1.4'
N N 0.0311 0.0180 'International Tables Vol C Tables 4.2.6.8 and 6.1.1.4'
O O 0.0492 0.0322 'International Tables Vol C Tables 4.2.6.8 and 6.1.1.4'

_symmetry_cell_setting           orthorhombic
_symmetry_space_group_name_H-M   'P 21 21 21'
_symmetry_int_tables_number      19
_chemical_absolute_configuration unk
_symmetry_space_group_name_Hall   'P 2ac 2ab '

loop_
_symmetry_equiv_pos_as_xyz
'x, y, z'
'x+1/2, -y+1/2, -z'
'-x, y+1/2, -z+1/2'
'-x+1/2, -y, z+1/2'

_cell_length_a                   7.24080(10)
_cell_length_b                   8.32250(10)
_cell_length_c                   34.4966(5)
_cell_angle_alpha                90.00
_cell_angle_beta                 90.00
_cell_angle_gamma                90.00
_cell_volume                     2078.82(5)
_cell_formula_units_Z            4
_cell_measurement_temperature    173(2)
_cell_measurement_reflns_used    4961
_cell_measurement_theta_min      5.13
_cell_measurement_theta_max      67.53
_exptl_crystal_size_max          0.42
_exptl_crystal_size_mid          0.24
_exptl_crystal_size_min          0.05
_exptl_crystal_density_meas      ?
_exptl_crystal_density_diffrn    1.168
_exptl_crystal_density_method    'not measured'
_exptl_crystal_F_000             784
_exptl_absorpt_coefficient_mu    0.610
_exptl_absorpt_correction_type   Multi-scan
_exptl_absorpt_correction_T_min  0.7050
_exptl_absorpt_correction_T_max  0.9701
_exptl_absorpt_process_details   SADABS
_exptl_special_details           
;
Data was collected using a BRUKER CCD (charge coupled device) based
diffractometer equipped with an Oxford low-temperature apparatus operating at
173 K.  A suitable crystal was chosen and mounted on a glass fiber or nylon loop
using Paratone oil for Mo radiation and Mineral oil for Copper radiation.  Data 
were measured using omega and Phi scans of 0.5\% per frame 
for 30 s. The total number of images were based on 
results from the program COSMO where redundancy was expected to be 4 and 
completeness to 0.83 to 100%. Cell parameters were
retrieved using APEX II software and refined using SAINT on all observed
reflections. Data reduction was performed using the SAINT software which
corrects for Lp and decay. Scaling and absorption corrections were performed 
by the SADABS program.  The structures are solved by the direct method
using the SHELX-90 program and refined by least squares method on F2 SHELXL-93,
incorporated in SHELXTL V6.1.
 
All H atoms were placed in calculated positions and refined using a riding
model.
C-H(aromatic) = 0.94  \%A and Uiso(H) = 1.2Ueq(C)
C-H (alaphatic) = 0.99 \%A and Uiso(H) = 1.2Ueq(C)
CH2 = 0.98 \%A and Uiso(H) = 1.2Ueq(C)
CH3 = 0.97\%A and Uiso(H) = 1.5Ueq(C)
N-H = 0.86 (0.92)\%A and Uiso(H) = 1.2 Ueq(N)
O-H(alcohol) = 0.85\%Aand Uiso(H) = 1.2Ueq(O)
O-H(acid) = 0.82\%A and Uiso(H) = 1.5Ueq(O)
;
_diffrn_radiation_probe          x-ray
_diffrn_radiation_type           CuK\a
_diffrn_radiation_wavelength     1.54178
_diffrn_source                   'fine-focus sealed tube'
_diffrn_radiation_monochromator  graphite
_diffrn_measurement_device_type  'Bruker APEX-II CCD'
_diffrn_measurement_method       '\f and \w scans'
_diffrn_detector_area_resol_mean 836.6
_diffrn_reflns_number            8198
_diffrn_reflns_av_R_equivalents  0.0303
_diffrn_reflns_av_sigmaI/netI    0.0353
_diffrn_reflns_limit_h_min       -8
_diffrn_reflns_limit_h_max       8
_diffrn_reflns_limit_k_min       -10
_diffrn_reflns_limit_k_max       9
_diffrn_reflns_limit_l_min       -40
_diffrn_reflns_limit_l_max       40
_diffrn_reflns_theta_min         2.56
_diffrn_reflns_theta_max         68.05
_reflns_number_total             3605
_reflns_number_gt                3363
_reflns_threshold_expression     >2sigma(I)

_computing_data_collection       'COSMO (BRUKER, V1.58, 2007)'
_computing_cell_refinement       'APEX2 (BRUKER, V5-0, 2008)'
_computing_data_reduction        'SAINT (BRUKER, V7.56A, 2008)'
_computing_structure_solution    
'SHELXS (Sheldrick, Acta Cryst. A64 2008, 112-122)'
_computing_structure_refinement  
'SHELXL (Sheldrick, Acta Cryst. A64 2008, 112-122)'
_computing_molecular_graphics    
'SHELXTL (Sheldrick, Acta Cryst. A64 2008, 112-122)'
_computing_publication_material  
'SHELXTL (Sheldrick, Acta Cryst. A64 2008, 112-122)'

_refine_special_details          
; 
 Refinement of F^2^ against ALL reflections.  The weighted R-factor wR and 
 goodness of fit S are based on F^2^, conventional R-factors R are based 
 on F, with F set to zero for negative F^2^. The threshold expression of 
 F^2^ > 2sigma(F^2^) is used only for calculating R-factors(gt) etc. and is 
 not relevant to the choice of reflections for refinement.  R-factors based 
 on F^2^ are statistically about twice as large as those based on F, and R- 
 factors based on ALL data will be even larger. 
;

_refine_ls_structure_factor_coef Fsqd
_refine_ls_matrix_type           full
_refine_ls_weighting_scheme      calc
_refine_ls_weighting_details     
'calc w=1/[\s^2^(Fo^2^)+(0.0675P)^2^+0.0927P] where P=(Fo^2^+2Fc^2^)/3'
_atom_sites_solution_primary     direct
_atom_sites_solution_secondary   difmap
_atom_sites_solution_hydrogens   geom
_refine_ls_hydrogen_treatment    constr
_refine_ls_extinction_method     none
_refine_ls_extinction_coef       ?
_refine_ls_abs_structure_details 'Flack H D (1983), Acta Cryst. A39, 876-881'
_refine_ls_abs_structure_Flack   0.3(2)
_refine_ls_number_reflns         3605
_refine_ls_number_parameters     248
_refine_ls_number_restraints     0
_refine_ls_R_factor_all          0.0420
_refine_ls_R_factor_gt           0.0386
_refine_ls_wR_factor_ref         0.1017
_refine_ls_wR_factor_gt          0.0988
_refine_ls_goodness_of_fit_ref   1.036
_refine_ls_restrained_S_all      1.036
_refine_ls_shift/su_max          0.000
_refine_ls_shift/su_mean         0.000

loop_
_atom_site_label
_atom_site_type_symbol
_atom_site_fract_x
_atom_site_fract_y
_atom_site_fract_z
_atom_site_U_iso_or_equiv
_atom_site_adp_type
_atom_site_occupancy
_atom_site_symmetry_multiplicity
_atom_site_calc_flag
_atom_site_refinement_flags
_atom_site_disorder_assembly
_atom_site_disorder_group
O1 O 0.53548(15) 0.57692(13) 0.12710(4) 0.0314(3) Uani 1 1 d . . .
O2 O 0.64965(18) 1.31161(13) 0.08979(4) 0.0330(3) Uani 1 1 d . . .
H2 H 0.5965 1.3812 0.1035 0.050 Uiso 1 1 calc R . .
O3 O -0.10722(17) 0.63897(15) 0.15260(4) 0.0392(3) Uani 1 1 d . . .
H3 H -0.2150 0.6404 0.1436 0.059 Uiso 1 1 calc R . .
N1 N 0.24854(18) 0.66169(17) 0.14116(4) 0.0277(3) Uani 1 1 d . . .
H1 H 0.1712 0.7432 0.1417 0.033 Uiso 1 1 calc R . .
C1 C 0.4211(2) 0.68792(18) 0.12989(4) 0.0246(3) Uani 1 1 d . . .
C2 C 0.4752(2) 0.85602(19) 0.12061(4) 0.0254(3) Uani 1 1 d . . .
C3 C 0.5882(2) 0.88126(18) 0.08841(4) 0.0257(3) Uani 1 1 d . . .
H3A H 0.6270 0.7910 0.0736 0.031 Uiso 1 1 calc R . .
C4 C 0.6459(2) 1.03256(19) 0.07719(4) 0.0251(3) Uani 1 1 d . . .
C5 C 0.5928(2) 1.16341(19) 0.10069(4) 0.0265(3) Uani 1 1 d . . .
C6 C 0.4854(2) 1.13862(19) 0.13367(5) 0.0288(3) Uani 1 1 d . . .
H6 H 0.4548 1.2272 0.1498 0.035 Uiso 1 1 calc R . .
C7 C 0.4228(2) 0.9870(2) 0.14322(4) 0.0271(3) Uani 1 1 d . . .
H7 H 0.3445 0.9721 0.1650 0.033 Uiso 1 1 calc R . .
C8 C 0.7586(2) 1.05979(19) 0.04095(4) 0.0279(3) Uani 1 1 d . . .
H8 H 0.7468 1.1764 0.0344 0.033 Uiso 1 1 calc R . .
C9 C 0.9698(2) 1.0233(2) 0.04376(5) 0.0339(4) Uani 1 1 d . . .
C10 C 1.0234(3) 1.0344(3) 0.00051(5) 0.0431(4) Uani 1 1 d . . .
H10A H 1.0445 1.1477 -0.0070 0.052 Uiso 1 1 calc R . .
H10B H 1.1377 0.9725 -0.0045 0.052 Uiso 1 1 calc R . .
C11 C 0.8622(3) 0.9639(3) -0.02229(5) 0.0462(5) Uani 1 1 d . . .
H11A H 0.8904 0.8527 -0.0305 0.055 Uiso 1 1 calc R . .
H11B H 0.8369 1.0295 -0.0457 0.055 Uiso 1 1 calc R . .
C12 C 0.6954(3) 0.9659(2) 0.00504(5) 0.0353(4) Uani 1 1 d . . .
H12A H 0.6591 0.8551 0.0122 0.042 Uiso 1 1 calc R . .
H12B H 0.5888 1.0196 -0.0074 0.042 Uiso 1 1 calc R . .
C13 C 1.0087(3) 0.8549(3) 0.05940(6) 0.0443(5) Uani 1 1 d . . .
H13A H 1.1420 0.8348 0.0590 0.067 Uiso 1 1 calc R . .
H13B H 0.9457 0.7753 0.0432 0.067 Uiso 1 1 calc R . .
H13C H 0.9633 0.8468 0.0861 0.067 Uiso 1 1 calc R . .
C14 C 1.0704(3) 1.1468(3) 0.06834(6) 0.0493(5) Uani 1 1 d . . .
H14A H 1.0251 1.1413 0.0951 0.074 Uiso 1 1 calc R . .
H14B H 1.0478 1.2545 0.0579 0.074 Uiso 1 1 calc R . .
H14C H 1.2032 1.1242 0.0679 0.074 Uiso 1 1 calc R . .
C15 C 0.1821(2) 0.5046(2) 0.15254(5) 0.0305(4) Uani 1 1 d . . .
H15 H 0.2484 0.4213 0.1370 0.037 Uiso 1 1 calc R . .
C16 C -0.0268(2) 0.4860(2) 0.14579(5) 0.0361(4) Uani 1 1 d . . .
H16 H -0.0537 0.4469 0.1190 0.043 Uiso 1 1 calc R . .
C17 C -0.0857(3) 0.3622(3) 0.17644(8) 0.0547(5) Uani 1 1 d . . .
H17A H -0.2122 0.3845 0.1859 0.066 Uiso 1 1 calc R . .
H17B H -0.0813 0.2518 0.1658 0.066 Uiso 1 1 calc R . .
C18 C 0.0534(4) 0.3835(3) 0.20821(8) 0.0601(6) Uani 1 1 d . . .
C19 C 0.0493(5) 0.3350(5) 0.24682(10) 0.0998(12) Uani 1 1 d . . .
H19 H -0.0526 0.2754 0.2565 0.120 Uiso 1 1 calc R . .
C20 C 0.1949(7) 0.3742(7) 0.27076(10) 0.1293(18) Uani 1 1 d . . .
H20 H 0.1911 0.3435 0.2973 0.155 Uiso 1 1 calc R . .
C21 C 0.3441(6) 0.4564(6) 0.25714(9) 0.1129(15) Uani 1 1 d . . .
H21 H 0.4436 0.4804 0.2741 0.135 Uiso 1 1 calc R . .
C22 C 0.3524(4) 0.5049(4) 0.21897(7) 0.0686(7) Uani 1 1 d . . .
H22 H 0.4559 0.5629 0.2094 0.082 Uiso 1 1 calc R . .
C23 C 0.2062(3) 0.4669(2) 0.19500(6) 0.0435(4) Uani 1 1 d . . .

loop_
_atom_site_aniso_label
_atom_site_aniso_U_11
_atom_site_aniso_U_22
_atom_site_aniso_U_33
_atom_site_aniso_U_23
_atom_site_aniso_U_13
_atom_site_aniso_U_12
O1 0.0253(6) 0.0250(5) 0.0438(6) -0.0035(5) 0.0006(5) 0.0026(5)
O2 0.0386(6) 0.0213(5) 0.0392(6) -0.0034(5) 0.0013(5) 0.0003(5)
O3 0.0241(6) 0.0384(6) 0.0550(7) -0.0061(6) -0.0016(5) 0.0015(5)
N1 0.0223(7) 0.0261(7) 0.0349(7) 0.0022(5) 0.0002(5) 0.0034(5)
C1 0.0238(7) 0.0268(8) 0.0230(6) -0.0032(6) -0.0021(6) 0.0024(6)
C2 0.0210(6) 0.0275(8) 0.0278(7) -0.0008(6) -0.0034(6) 0.0035(6)
C3 0.0245(7) 0.0243(7) 0.0283(7) -0.0060(6) -0.0006(6) 0.0024(6)
C4 0.0223(7) 0.0259(8) 0.0271(7) -0.0012(6) -0.0038(6) 0.0015(6)
C5 0.0244(7) 0.0246(7) 0.0304(7) -0.0023(6) -0.0062(6) 0.0015(7)
C6 0.0295(8) 0.0253(7) 0.0315(8) -0.0072(6) -0.0034(6) 0.0059(6)
C7 0.0250(7) 0.0306(8) 0.0256(7) -0.0013(6) -0.0007(6) 0.0049(7)
C8 0.0301(8) 0.0244(7) 0.0291(7) 0.0019(6) -0.0022(6) -0.0007(6)
C9 0.0288(8) 0.0407(9) 0.0323(8) 0.0001(7) 0.0044(6) -0.0005(8)
C10 0.0407(10) 0.0498(11) 0.0389(9) 0.0015(9) 0.0117(8) -0.0053(9)
C11 0.0501(12) 0.0566(12) 0.0320(8) -0.0045(9) 0.0057(8) 0.0012(10)
C12 0.0401(9) 0.0384(9) 0.0275(7) -0.0027(7) 0.0006(7) -0.0033(8)
C13 0.0339(9) 0.0535(11) 0.0456(9) 0.0073(9) 0.0068(8) 0.0150(9)
C14 0.0331(10) 0.0676(13) 0.0470(10) -0.0055(10) -0.0027(8) -0.0118(10)
C15 0.0272(8) 0.0266(8) 0.0378(8) 0.0017(7) 0.0007(6) 0.0001(7)
C16 0.0267(8) 0.0351(9) 0.0466(9) -0.0054(8) 0.0009(7) -0.0041(7)
C17 0.0402(10) 0.0423(11) 0.0817(15) 0.0063(10) 0.0105(11) -0.0120(9)
C18 0.0585(14) 0.0545(13) 0.0674(14) 0.0249(11) 0.0089(11) -0.0050(11)
C19 0.095(2) 0.116(3) 0.089(2) 0.064(2) 0.020(2) -0.011(2)
C20 0.135(3) 0.188(5) 0.0652(19) 0.078(3) -0.007(2) -0.005(3)
C21 0.104(3) 0.172(4) 0.0630(17) 0.054(2) -0.0363(17) -0.017(3)
C22 0.0612(15) 0.0903(19) 0.0542(12) 0.0273(13) -0.0192(11) -0.0068(14)
C23 0.0403(10) 0.0420(10) 0.0484(10) 0.0157(9) -0.0010(8) 0.0000(9)

_geom_special_details            
; 
 All esds (except the esd in the dihedral angle between two l.s. planes) 
 are estimated using the full covariance matrix.  The cell esds are taken 
 into account individually in the estimation of esds in distances, angles 
 and torsion angles; correlations between esds in cell parameters are only 
 used when they are defined by crystal symmetry.  An approximate (isotropic) 
 treatment of cell esds is used for estimating esds involving l.s. planes. 
;

loop_
_geom_bond_atom_site_label_1
_geom_bond_atom_site_label_2
_geom_bond_distance
_geom_bond_site_symmetry_2
_geom_bond_publ_flag
O1 C1 1.244(2) . ?
O2 C5 1.353(2) . ?
O2 H2 0.8400 . ?
O3 C16 1.420(2) . ?
O3 H3 0.8400 . ?
N1 C1 1.326(2) . ?
N1 C15 1.447(2) . ?
N1 H1 0.8800 . ?
C1 C2 1.488(2) . ?
C2 C7 1.393(2) . ?
C2 C3 1.396(2) . ?
C3 C4 1.382(2) . ?
C3 H3A 0.9500 . ?
C4 C5 1.411(2) . ?
C4 C8 1.510(2) . ?
C5 C6 1.394(2) . ?
C6 C7 1.381(2) . ?
C6 H6 0.9500 . ?
C7 H7 0.9500 . ?
C8 C12 1.534(2) . ?
C8 C9 1.562(2) . ?
C8 H8 1.0000 . ?
C9 C14 1.518(3) . ?
C9 C13 1.528(3) . ?
C9 C10 1.544(2) . ?
C10 C11 1.525(3) . ?
C10 H10A 0.9900 . ?
C10 H10B 0.9900 . ?
C11 C12 1.532(3) . ?
C11 H11A 0.9900 . ?
C11 H11B 0.9900 . ?
C12 H12A 0.9900 . ?
C12 H12B 0.9900 . ?
C13 H13A 0.9800 . ?
C13 H13B 0.9800 . ?
C13 H13C 0.9800 . ?
C14 H14A 0.9800 . ?
C14 H14B 0.9800 . ?
C14 H14C 0.9800 . ?
C15 C23 1.508(3) . ?
C15 C16 1.538(2) . ?
C15 H15 1.0000 . ?
C16 C17 1.536(3) . ?
C16 H16 1.0000 . ?
C17 C18 1.499(4) . ?
C17 H17A 0.9900 . ?
C17 H17B 0.9900 . ?
C18 C23 1.384(3) . ?
C18 C19 1.392(4) . ?
C19 C20 1.379(6) . ?
C19 H19 0.9500 . ?
C20 C21 1.362(6) . ?
C20 H20 0.9500 . ?
C21 C22 1.378(4) . ?
C21 H21 0.9500 . ?
C22 C23 1.380(3) . ?
C22 H22 0.9500 . ?

loop_
_geom_angle_atom_site_label_1
_geom_angle_atom_site_label_2
_geom_angle_atom_site_label_3
_geom_angle
_geom_angle_site_symmetry_1
_geom_angle_site_symmetry_3
_geom_angle_publ_flag
C5 O2 H2 109.5 . . ?
C16 O3 H3 109.5 . . ?
C1 N1 C15 122.78(14) . . ?
C1 N1 H1 118.6 . . ?
C15 N1 H1 118.6 . . ?
O1 C1 N1 121.83(15) . . ?
O1 C1 C2 120.40(14) . . ?
N1 C1 C2 117.77(14) . . ?
C7 C2 C3 119.20(14) . . ?
C7 C2 C1 122.92(14) . . ?
C3 C2 C1 117.86(13) . . ?
C4 C3 C2 122.50(14) . . ?
C4 C3 H3A 118.7 . . ?
C2 C3 H3A 118.7 . . ?
C3 C4 C5 117.37(14) . . ?
C3 C4 C8 122.14(14) . . ?
C5 C4 C8 120.48(14) . . ?
O2 C5 C6 122.10(14) . . ?
O2 C5 C4 117.44(14) . . ?
C6 C5 C4 120.46(15) . . ?
C7 C6 C5 120.89(14) . . ?
C7 C6 H6 119.6 . . ?
C5 C6 H6 119.6 . . ?
C6 C7 C2 119.47(14) . . ?
C6 C7 H7 120.3 . . ?
C2 C7 H7 120.3 . . ?
C4 C8 C12 115.53(14) . . ?
C4 C8 C9 116.64(13) . . ?
C12 C8 C9 104.06(14) . . ?
C4 C8 H8 106.6 . . ?
C12 C8 H8 106.6 . . ?
C9 C8 H8 106.6 . . ?
C14 C9 C13 109.57(16) . . ?
C14 C9 C10 112.25(15) . . ?
C13 C9 C10 110.45(15) . . ?
C14 C9 C8 111.90(15) . . ?
C13 C9 C8 112.38(14) . . ?
C10 C9 C8 100.04(13) . . ?
C11 C10 C9 106.45(15) . . ?
C11 C10 H10A 110.4 . . ?
C9 C10 H10A 110.4 . . ?
C11 C10 H10B 110.4 . . ?
C9 C10 H10B 110.4 . . ?
H10A C10 H10B 108.6 . . ?
C10 C11 C12 106.36(14) . . ?
C10 C11 H11A 110.5 . . ?
C12 C11 H11A 110.5 . . ?
C10 C11 H11B 110.5 . . ?
C12 C11 H11B 110.5 . . ?
H11A C11 H11B 108.6 . . ?
C11 C12 C8 105.51(15) . . ?
C11 C12 H12A 110.6 . . ?
C8 C12 H12A 110.6 . . ?
C11 C12 H12B 110.6 . . ?
C8 C12 H12B 110.6 . . ?
H12A C12 H12B 108.8 . . ?
C9 C13 H13A 109.5 . . ?
C9 C13 H13B 109.5 . . ?
H13A C13 H13B 109.5 . . ?
C9 C13 H13C 109.5 . . ?
H13A C13 H13C 109.5 . . ?
H13B C13 H13C 109.5 . . ?
C9 C14 H14A 109.5 . . ?
C9 C14 H14B 109.5 . . ?
H14A C14 H14B 109.5 . . ?
C9 C14 H14C 109.5 . . ?
H14A C14 H14C 109.5 . . ?
H14B C14 H14C 109.5 . . ?
N1 C15 C23 114.38(15) . . ?
N1 C15 C16 112.17(14) . . ?
C23 C15 C16 103.88(15) . . ?
N1 C15 H15 108.7 . . ?
C23 C15 H15 108.7 . . ?
C16 C15 H15 108.7 . . ?
O3 C16 C17 111.92(16) . . ?
O3 C16 C15 106.72(14) . . ?
C17 C16 C15 103.70(15) . . ?
O3 C16 H16 111.4 . . ?
C17 C16 H16 111.4 . . ?
C15 C16 H16 111.4 . . ?
C18 C17 C16 103.72(16) . . ?
C18 C17 H17A 111.0 . . ?
C16 C17 H17A 111.0 . . ?
C18 C17 H17B 111.0 . . ?
C16 C17 H17B 111.0 . . ?
H17A C17 H17B 109.0 . . ?
C23 C18 C19 118.5(3) . . ?
C23 C18 C17 110.86(19) . . ?
C19 C18 C17 130.6(3) . . ?
C20 C19 C18 119.2(3) . . ?
C20 C19 H19 120.4 . . ?
C18 C19 H19 120.4 . . ?
C21 C20 C19 121.3(3) . . ?
C21 C20 H20 119.4 . . ?
C19 C20 H20 119.4 . . ?
C20 C21 C22 120.7(3) . . ?
C20 C21 H21 119.6 . . ?
C22 C21 H21 119.6 . . ?
C21 C22 C23 118.2(3) . . ?
C21 C22 H22 120.9 . . ?
C23 C22 H22 120.9 . . ?
C22 C23 C18 122.1(2) . . ?
C22 C23 C15 128.56(19) . . ?
C18 C23 C15 109.36(19) . . ?

loop_
_geom_torsion_atom_site_label_1
_geom_torsion_atom_site_label_2
_geom_torsion_atom_site_label_3
_geom_torsion_atom_site_label_4
_geom_torsion
_geom_torsion_site_symmetry_1
_geom_torsion_site_symmetry_2
_geom_torsion_site_symmetry_3
_geom_torsion_site_symmetry_4
_geom_torsion_publ_flag
C15 N1 C1 O1 2.6(2) . . . . ?
C15 N1 C1 C2 -177.27(13) . . . . ?
O1 C1 C2 C7 -137.12(15) . . . . ?
N1 C1 C2 C7 42.8(2) . . . . ?
O1 C1 C2 C3 40.9(2) . . . . ?
N1 C1 C2 C3 -139.24(15) . . . . ?
C7 C2 C3 C4 -2.1(2) . . . . ?
C1 C2 C3 C4 179.77(14) . . . . ?
C2 C3 C4 C5 2.7(2) . . . . ?
C2 C3 C4 C8 -176.23(14) . . . . ?
C3 C4 C5 O2 179.82(14) . . . . ?
C8 C4 C5 O2 -1.2(2) . . . . ?
C3 C4 C5 C6 -0.4(2) . . . . ?
C8 C4 C5 C6 178.58(14) . . . . ?
O2 C5 C6 C7 177.26(14) . . . . ?
C4 C5 C6 C7 -2.5(2) . . . . ?
C5 C6 C7 C2 3.1(2) . . . . ?
C3 C2 C7 C6 -0.8(2) . . . . ?
C1 C2 C7 C6 177.14(14) . . . . ?
C3 C4 C8 C12 43.2(2) . . . . ?
C5 C4 C8 C12 -135.73(16) . . . . ?
C3 C4 C8 C9 -79.57(19) . . . . ?
C5 C4 C8 C9 101.53(17) . . . . ?
C4 C8 C9 C14 -71.09(19) . . . . ?
C12 C8 C9 C14 160.39(15) . . . . ?
C4 C8 C9 C13 52.7(2) . . . . ?
C12 C8 C9 C13 -75.84(17) . . . . ?
C4 C8 C9 C10 169.85(14) . . . . ?
C12 C8 C9 C10 41.34(17) . . . . ?
C14 C9 C10 C11 -155.60(17) . . . . ?
C13 C9 C10 C11 81.80(19) . . . . ?
C8 C9 C10 C11 -36.80(19) . . . . ?
C9 C10 C11 C12 18.7(2) . . . . ?
C10 C11 C12 C8 7.9(2) . . . . ?
C4 C8 C12 C11 -160.29(15) . . . . ?
C9 C8 C12 C11 -31.10(18) . . . . ?
C1 N1 C15 C23 88.97(19) . . . . ?
C1 N1 C15 C16 -153.06(15) . . . . ?
N1 C15 C16 O3 -33.8(2) . . . . ?
C23 C15 C16 O3 90.27(17) . . . . ?
N1 C15 C16 C17 -152.10(15) . . . . ?
C23 C15 C16 C17 -28.05(19) . . . . ?
O3 C16 C17 C18 -87.5(2) . . . . ?
C15 C16 C17 C18 27.2(2) . . . . ?
C16 C17 C18 C23 -16.7(3) . . . . ?
C16 C17 C18 C19 162.8(3) . . . . ?
C23 C18 C19 C20 1.4(6) . . . . ?
C17 C18 C19 C20 -178.0(4) . . . . ?
C18 C19 C20 C21 -1.5(8) . . . . ?
C19 C20 C21 C22 1.0(8) . . . . ?
C20 C21 C22 C23 -0.5(7) . . . . ?
C21 C22 C23 C18 0.4(5) . . . . ?
C21 C22 C23 C15 -179.6(3) . . . . ?
C19 C18 C23 C22 -0.9(4) . . . . ?
C17 C18 C23 C22 178.7(2) . . . . ?
C19 C18 C23 C15 179.1(3) . . . . ?
C17 C18 C23 C15 -1.4(3) . . . . ?
N1 C15 C23 C22 -38.6(3) . . . . ?
C16 C15 C23 C22 -161.2(3) . . . . ?
N1 C15 C23 C18 141.42(18) . . . . ?
C16 C15 C23 C18 18.8(2) . . . . ?

loop_
_geom_hbond_atom_site_label_D
_geom_hbond_atom_site_label_H
_geom_hbond_atom_site_label_A
_geom_hbond_distance_DH
_geom_hbond_distance_HA
_geom_hbond_distance_DA
_geom_hbond_angle_DHA
_geom_hbond_site_symmetry_A
O3 H3 O1 0.84 1.97 2.7810(17) 163.1 1_455
O2 H2 O1 0.84 1.87 2.6862(16) 162.0 1_565

_diffrn_measured_fraction_theta_max 0.981
_diffrn_reflns_theta_full        67.50
_diffrn_measured_fraction_theta_full 0.986
_refine_diff_density_max         0.198
_refine_diff_density_min         -0.215
_refine_diff_density_rms         0.037
